# Supplementary material
Source: HighWire-hosted journal article supplement (https://thorax.bmj.com/highwire/filestream/174176/field_highwire_adjunct_files/1/Supplementary_figure1.pdf)

Supplementary Figure 1

A

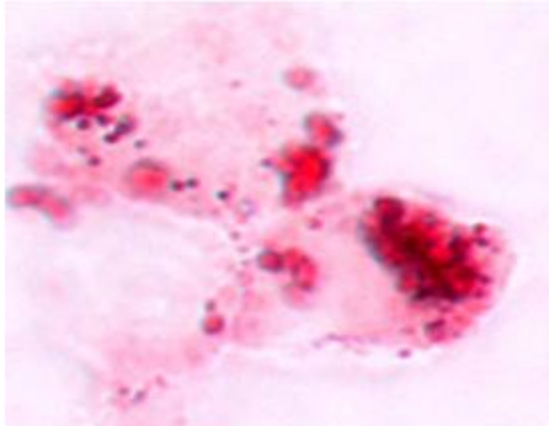

B

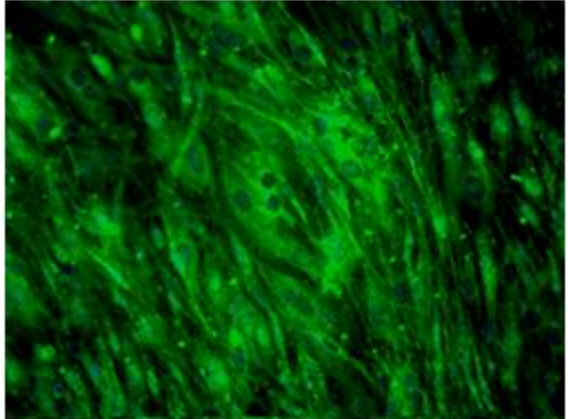

C

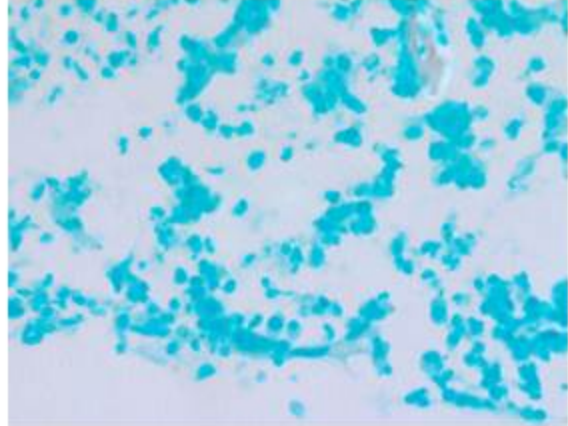

Supplement: Supplementary_figure1.pdf [file Supplementary_figure1.pdf]
